# Supplementary material for: Design of honeycomb structure surfaces with controllable oil adhesion underwater
Source: Royal Society of Chemistry journal article supplement (doi:10.1039/c5ra10514e), 2015-01-01
Supplement: c5ra10514e1.pdf [file c5ra10514e1.pdf]

# Design of Honeycomb Structure Surface with Controllable Oil Adhesion Underwater

Tianqi Guo, Muchen Li, Liping Heng,\* and Lei Jiang

School of Chemistry and Environment, Beihang University, 100191 China.

Email: henglp@iccas.ac.cn

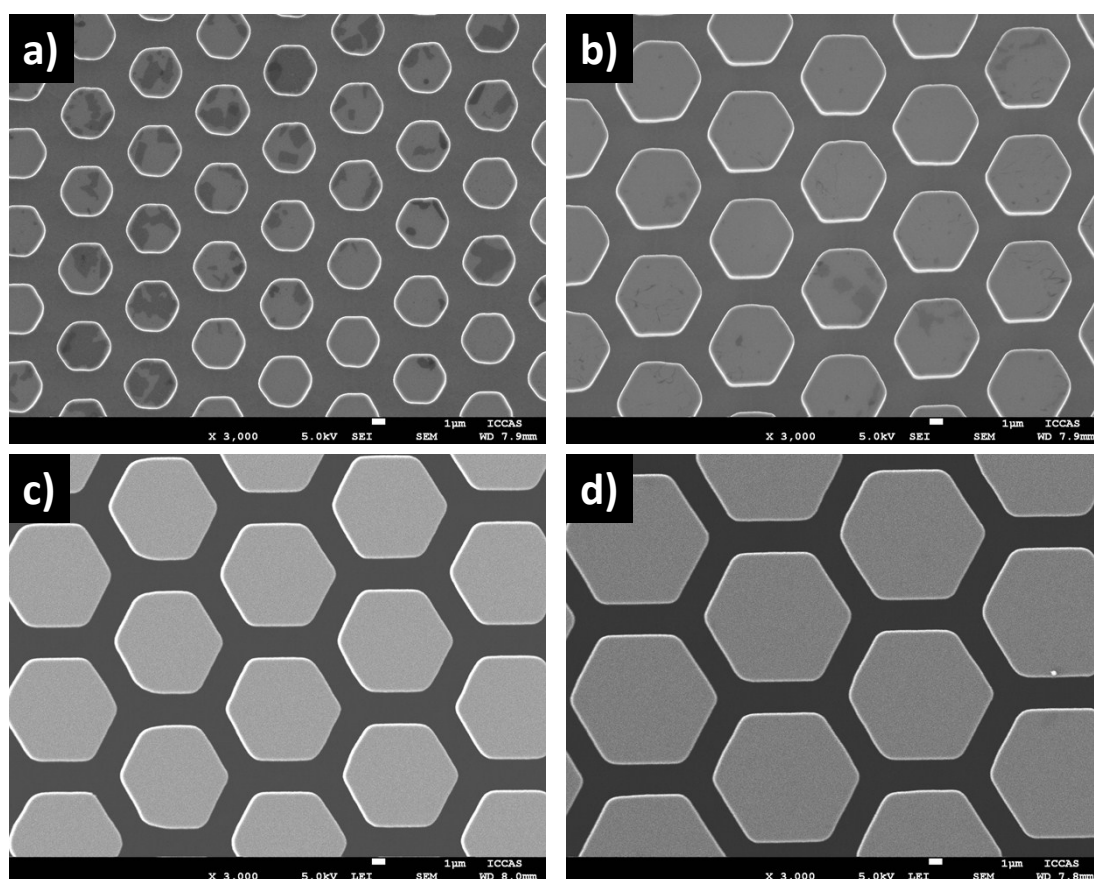

Figure S1 SEM images of hexagonal silicon pillar templates with different sizes. a) 4 μm, b) 6 μm, c) 8 μm, d) 10 μm. The distance between two pillars is 1.5 μm.

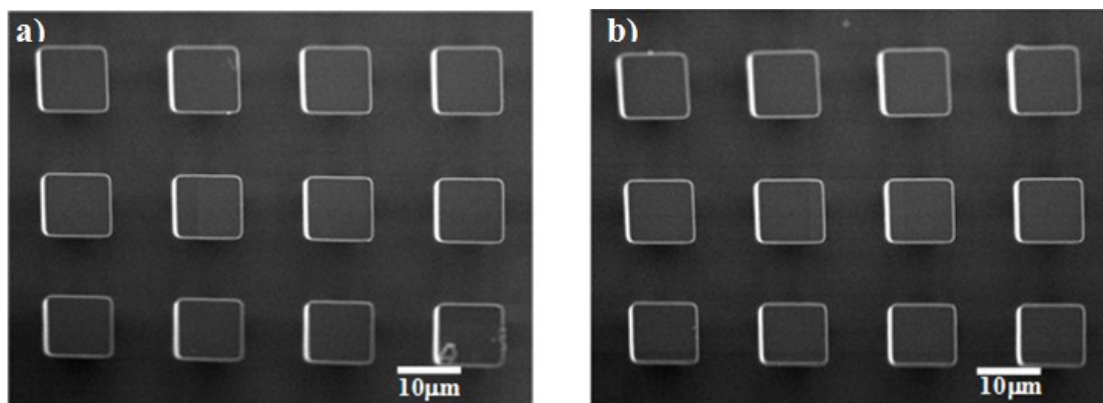

Figure S2. SEM images of a) superoleophobic square-pillar-structured silicon substrates underwater, b) oleophilic square-pillar-structured silicon substrates underwater.

#### **Squared-pillar-structured substrate preparation and modification**

Silicon wafers (4 in. in diameter, P/N doped, <100> oriented, 525  $\mu\text{m}$  thick) were structured by standard photolithography techniques that can be found elsewhere[1-2]. The dimension of the silicon pillars in our experiment was  $10\times 10\ \mu\text{m}$ , the distance between two adjacent pillars was 10  $\mu\text{m}$ , and the height of the silicon pillars was 10  $\mu\text{m}$ . The superoleophobic pillar-structured silicon substrates underwater were prepared by treating the silicon substrates with O<sub>2</sub> plasma in the power of 200 W for 300 s. The oleophilic pillar-structured silicon substrates underwater were prepared by silanizing the silicon substrates with FAS (1H, 1H, 2H, 2H-perfluorodecyltrimethoxysilane) in a decompression environment at 80 °C for 4 h.

[1] J. Linnros, X. Badel, P. Kleimann. *Phys. Scr*, 2006, **T126**, 72-76.

[2] T. Q. Guo, M. C. Li, L. P. Heng, L. Jiang, *Phys. Chem. Chem. Phys.*, 2015, **17**, 6242-6247.
